# Supplementary material
Source: publisher figshare collection journal article supplement (https://sage.figshare.com/ndownloader/files/13638344)
Supplement: Supplementary file 1 [file 13638344]

## SUPPLEMENTAL MATERIALS

## COMPREHENSIVE LIST OF ARTICLES INCLUDED IN APPENDIX A

- Aker, A., El-Haj, M., Albakour, M. D., & Kruschwitz, U. 2012. Assessing crowdsourcing quality through objective tasks. *Proceedings of the Language Resources and Evaluation Conference*: 1456–1461.
- Alonso, O., & Mizzaro, S. 2012. Using crowdsourcing for TREC relevance assessment. *Information Processing & Management*, 48: 1053–1066.
- Aust, F., Diedenhofen, B., Ullrich, S., & Musch, J. 2013. Seriousness checks are useful to improve data validity in online research. *Behavior Research Methods*, 45: 527–535.
- Barger, P., Behrend, T. S., Sharek, D. J., & Sinar, E. F. 2011. IO and the crowd: Frequently asked questions about using Mechanical Turk for research. *The Industrial-Organizational Psychologist*, 49: 11–17.
- Behrend, T. S., Sharek, D. J., Meade, A. W., & Wiebe, E. N. 2011. The viability of crowdsourcing for survey research. *Behavior Research Methods*, 43: 800–813.
- Berinsky, A. J., Huber, G. A., & Lenz, G. S. 2012. Evaluating online labor markets for experimental research: Amazon.com's Mechanical Turk. *Political Analysis*, 20: 351–368.
- Brawley, A. M., & Pury, C. L. 2016. Work experiences on MTurk: Job satisfaction, turnover, and information sharing. *Computers in Human Behavior*, 54: 531–546.
- Buhrmester, M., Kwang, T., & Gosling, S. D. 2011. Amazon's Mechanical Turk: A new source of inexpensive, yet high-quality, data? *Perspectives on Psychological Science*, 6: 3–5.
- Chandler, D., & Kapelner, A. 2013. Breaking monotony with meaning: Motivation in crowdsourcing markets. *Journal of Economic Behavior & Organization*, 90: 123–133.

- Chandler, J., Mueller, P., & Paolacci, G. 2014. Nonnaïveté among Amazon Mechanical Turk workers: Consequences and solutions for behavioral researchers. *Behavior Research Methods*, 46: 112–130.
- Chandler, J., Paolacci, G., Peer, E., Mueller, P., & Ratliff, K. A. 2015. Using nonnaive participants can reduce effect sizes. *Psychological Science*, 26: 1131–1139.
- Chandler, J., & Shapiro, D. 2016. Conducting clinical research using crowdsourced convenience samples. *Annual Review of Clinical Psychology*, 12: 53–81.
- Cheung, J. H., Burns, D. K., Sinclair, R. R., & Sliter, M. 2017. Amazon Mechanical Turk in organizational psychology: An evaluation and practical recommendations. *Journal of Business Psychology*, 32: 347–361.
- Chilton, L. B., Horton, J. J., Miller, R. C., & Azenkot, S. 2010. Task search in a human computation market. *Proceedings of the Association for Computing Machinery Special Interest Group of Knowledge Discovery and Data Mining Workshop on Human Computation*:1–9.
- Clifford, S., & Jerit, J. 2014. Is there a cost to convenience? An experimental comparison of data quality in laboratory and online studies. *Journal of Experimental Political Science*, 1: 120–131.
- Crone, D.L., & Williams, L.A. 2017. Crowdsourcing participants for psychological research in Australia: A test of microworkers. *Australian Journal of Psychology*, 69: 39–47.
- Crump, M. J., McDonnell, J. V., & Gureckis, T. M. 2013. Evaluating Amazon's Mechanical Turk as a tool for experimental behavioral research. *PloS one*, 8, e57410.

Downs, J. S., Holbrook, M. B., & Peel, E. 2012. *Screening participants on Mechanical Turk:*

*Techniques and justifications*. Paper presented at the Annual Conference of the

Association for Consumer Research: 113–114.

Feitosa, J., Joseph, D. L., & Newman, D. A. 2015. Crowdsourcing and personality measurement

equivalence: A warning about countries whose primary language is not

English. *Personality and Individual Differences*, 75: 47–52.

Fisher, G. G., & Sandell, K. 2015. Sampling in Industrial–Organizational Psychology research:

Now what? *Industrial and Organizational Psychology*, 8: 232–237.

Fleischer, A., Mead, A. D., & Huang, J. 2015. Inattentive responding in MTurk and other online

samples. *Industrial and Organizational Psychology*, 8: 196–202.

Gleibs, I. H. 2017. Are all “research fields” equal? Rethinking practice for the use of data from

crowdsourcing market places. *Behavior Research Methods*, 49: 1333–1342.

Goodman, J. K., Cryder, C. E., & Cheema, A. 2013. Data collection in a flat world: The

strengths and weaknesses of Mechanical Turk samples. *Journal of Behavioral Decision*

*Making*, 26: 213–224.

Goodman, J. K., & Paolacci, G. 2017. Crowdsourcing consumer research. *Journal of Consumer*

*Research*, 44: 196–210.

Görizt, A. S. 2007. Using online panels in psychological research. In A. N. Joinson, K. Y. A.

McKenna, T. Postmes, & U. -D. Reips (Eds.), *The Oxford Handbook of Internet*

*Psychology*: 473–485. Oxford, England: Oxford University Press.

Gosling, S. D., Vazire, S., Srivastava, S., & John, O. P. 2004. Should we trust web-based

studies? A comparative analysis of six preconceptions about internet

questionnaires. *American Psychologist*, 59: 93–104.

- Harms, P. D., & DeSimone, J. A. 2015. Caution! MTurk workers ahead—fines doubled. *Industrial and Organizational Psychology*, 8: 183–190.
- Hauser, D. J., & Schwarz, N. 2016. Attentive Turkers: MTurk participants perform better on online attention checks than do subject pool participants. *Behavior Research Methods*, 48: 400–407.
- Horton, J. J., & Chilton, L. B. 2010. The labor economics of paid crowdsourcing. *Proceedings of the 11th ACM Conference on Electronic Commerce*: 209–218.
- Horton, J. J., Rand, D. G., & Zeckhauser, R. J. 2011. The online laboratory: Conducting experiments in a real labor market. *Experimental Economics*, 14: 399–425.
- Huang, J. L., Curran, P. G., Keeney, J., Poposki, E. M., & DeShon, R. P. 2012. Detecting and deterring insufficient effort responding to surveys. *Journal of Business and Psychology*, 27: 99–114.
- Huang, J. L., Bowling, N. A., Liu, M., & Li, Y. 2015. Detecting insufficient effort responding with an infrequency scale: Evaluating validity and participant reactions. *Journal of Business and Psychology*, 30: 299–311.
- Huang, J. L., Liu, M., & Bowling, N. A. 2015. Insufficient effort responding: Examining an insidious confound in survey data. *Journal of Applied Psychology*, 100: 828–845.
- Jilke, S., Van Ryzin, G. G., & Van de Walle, S. 2016. Responses to decline in marketized public services: An experimental evaluation of choice overload. *Journal of Public Administration Research and Theory*, 26: 421–432.
- Keith, M. G., Tay, L., & Harms, P. D. 2017. Systems perspective of Amazon Mechanical Turk for organizational research: Review and recommendations. *Frontiers in Psychology*, 8: 1–9.

- Klitzman, R. 2013. How IRBs view and make decisions about coercion and undue influence. *Journal of Medical Ethics*, 39: 224–229.
- Landers, R. N., & Behrend, T. S. 2015. An inconvenient truth: Arbitrary distinctions between organizational, Mechanical Turk, and other convenience samples. *Industrial and Organizational Psychology*, 8: 142–164.
- Largent, E. A., Grady, C., Miller, F. G., & Wertheimer, A. 2012. Money, coercion, and undue inducement: A survey of attitudes about payments to research participants. *IRB: Ethics & Human Research*, 34: 1–8.
- Lease, M., Hullman, J., Bigam, J. P., Bernstein, M., Kim, J., Lasecki, W. S., Bakhshi, S., Mitra, T., & Miller, R. C. 2013. Mechanical Turk is not anonymous.  
<http://dx.doi.org/10.2139/ssrn.2228728>.
- Litman, L., Robinson, J., & Rosenzweig, C. 2015. The relationship between motivation, monetary compensation, and data quality among US-and India-based workers on Mechanical Turk. *Behavior Research Methods*, 47: 519–528.
- Litman, L., Robinson, J., & Abberbock, T. 2017. TurkPrime.com: A versatile crowdsourcing data acquisition platform for the behavioral sciences. *Behavior Research Methods*, 49: 433–442.
- Lovett, M., Bajaba, S., Lovett, M., & Simmering, M. J. 2018. Data quality from crowdsourced surveys: A mixed method inquiry into perceptions of Amazon's Mechanical Turk masters. *Applied Psychology*, 67: 339–366.
- Mason, W., & Suri, S. 2012. Conducting behavioral research on Amazon's Mechanical Turk. *Behavior Research Methods*, 44: 1–23.

- Mason, W., & Watts, D. J. 2009. Financial incentives and the “performance of crowds.” *Proceedings of the Association for Computing Machinery Special Interest Group of Knowledge Discovery and Data Mining Workshop on Human Computation*: 77–85.
- Matthijsse, S. M., De Leeuw, E. D., & Hox, J. J. 2015. Internet panels, professional respondents, and data quality. *Methodology*, 11: 81–88.
- McGonagle, A. K. (2015). Participant motivation: A critical consideration. *Industrial and Organizational Psychology*, 2: 208-214.
- Meade, A. W., & Craig, S. B. 2012. Identifying careless responses in survey data. *Psychological Methods*, 17: 437–455.
- Miller, J. D., Crowe, M., Weiss, B., Maples-Keller, J. L., & Lynam, D. R. 2017. Using online, crowdsourcing platforms for data collection in personality disorder research: The example of Amazon’s Mechanical Turk. *Personality disorders: Theory, research, and treatment*, 8: 26–34.
- Ng, T. W., & Feldman, D. C. 2012. The effects of organizational and community embeddedness on work-to-family and family-to-work conflict. *Journal of Applied Psychology*, 97: 1233–1251.
- Ng, T. W., & Feldman, D. C. 2015. Idiosyncratic deals and voice behavior. *Journal of Management*, 41: 893–928.
- Oppenheimer, D. M., Meyvis, T., & Davidenko, N. 2009. Instructional manipulation checks: Detecting satisficing to increase statistical power. *Journal of Experimental Social Psychology*, 45: 867–872.

- Paolacci, G., & Chandler, J. 2014. Inside the Turk: Understanding Mechanical Turk as a participant pool. *Current Directions in Psychological Science*, 23: 184–188.
- Paolacci, G., Chandler, J., & Ipeirotis, P. G. 2010. Running experiments on Amazon Mechanical Turk. *Judgement and Decision Making*, 5: 411–419.
- Peer, E., Brandimarte, L., Samat, S., & Acquisti, A. 2017. Beyond the Turk: Alternative platforms for crowdsourcing behavioral research. *Journal of Experimental Social Psychology*, 70: 153–163.
- Peer, E., Vosgerau, J., & Acquisti, A. 2014. Reputation as a sufficient condition for data quality on Amazon Mechanical Turk. *Behavior Research Methods*, 46: 1023–1031.
- Peterson, R. A., & Merunka, D. R. 2014. Convenience samples of college students and research reproducibility. *Journal of Business Research*, 67: 1035–1041.
- Ran, S., Liu, M., Marchiondo, L. A., & Huang, J. L. 2015. Difference in response effort across sample types: Perception or reality?. *Industrial and Organizational Psychology*, 8: 202–208.
- Rogstadius, J., Kostakos, V., Kittur, A., Smus, B., Laredo, J., & Vukovic, M. 2011. *An assessment of intrinsic and extrinsic motivation on task performance in crowdsourcing markets*. Paper presented at the 5th International AAAI Conference on Weblogs and Social Media.
- Rouse, S. V. 2015. A reliability analysis of Mechanical Turk data. *Computers in Human Behavior*, 43: 304–307.
- Schmidt, G. B. 2015. Fifty days an MTurk worker: The social and motivational context for Amazon Mechanical Turk workers. *Industrial and Organizational Psychology*, 8: 165–171.

- Shapiro, D. N., Chandler, J., & Mueller, P. A. 2013. Using Mechanical Turk to study clinical populations. *Clinical Psychological Science*, 1: 213–220.
- Sharpe Wessling, K., Huber, J., & Netzer, O. 2017. MTurk character misrepresentation: Assessment and solutions. *Journal of Consumer Research*, 44: 211–230.
- Simmons, J. P., Nelson, L. D., & Simonsohn, U. 2011. False-positive psychology: Undisclosed flexibility in data collection and analysis allows presenting anything as significant. *Psychological Science*, 22: 1359–1366.
- Smith, N. A., Sabat, I. E., Martinez, L. R., Weaver, K., & Xu, S. 2015. A convenient solution: Using MTurk to sample from hard-to-reach populations. *Industrial and Organizational Psychology*, 8: 220–228.
- Sprouse, J. 2011. A validation of Amazon Mechanical Turk for the collection of acceptability judgments in linguistic theory. *Behavior Research Methods*, 43: 155–167.
- Stritch, J. M., Pedersen, M. J., & Taggart, G. 2017. The opportunities and limitations of using Mechanical Turk (Mturk) in public administration and management scholarship. *International Public Management Journal*, 20: 489–511.
- Woo, S. E., Keith, M., & Thornton, M. A. 2015. Amazon Mechanical Turk for industrial and organizational psychology: Advantages, challenges, and practical recommendations. *Industrial and Organizational Psychology*, 8, 171–179.
- Woods, C. M. 2006. Careless responding to reverse-worded items: Implications for confirmatory factor analysis. *Journal of Psychopathology and Behavioral Assessment*, 28: 189–194.
